# Supplementary material for: Targeting of vulnerabilities of drug-tolerant persisters identified through functional genetics delays tumor relapse
Source: PubMed Central journal article supplement — Cell Rep Med. 2024 Mar 21;5(3):101471. doi: 10.1016/j.xcrm.2024.101471 (PMC10983104; doi:10.1016/j.xcrm.2024.101471), 2024-03-21
Supplement: mmc1.pdf [file mmc1.pdf]

**Cell Reports Medicine, Volume 5**

**Supplemental information**

**Targeting of vulnerabilities of drug-tolerant  
persisters identified through functional  
genetics delays tumor relapse**

**Mengnuo Chen, Sara Mainardi, Cor Liefstink, Arno Velds, Iris de Rink, Chen Yang, Hendrik J. Kuiken, Ben Morris, Finn Edwards, Fleur Jochems, Olaf van Tellingen, Manon Boeije, Natalie Proost, Robin A. Jansen, Shifan Qin, Haojie Jin, J.C. Koen van der Mijn, Arnout Schepers, Subramanian Venkatesan, Wenxin Qin, Roderick L. Beijersbergen, Liqin Wang, and René Bernards**

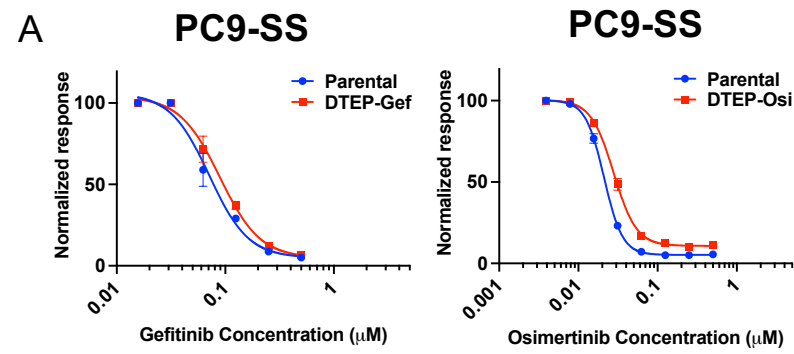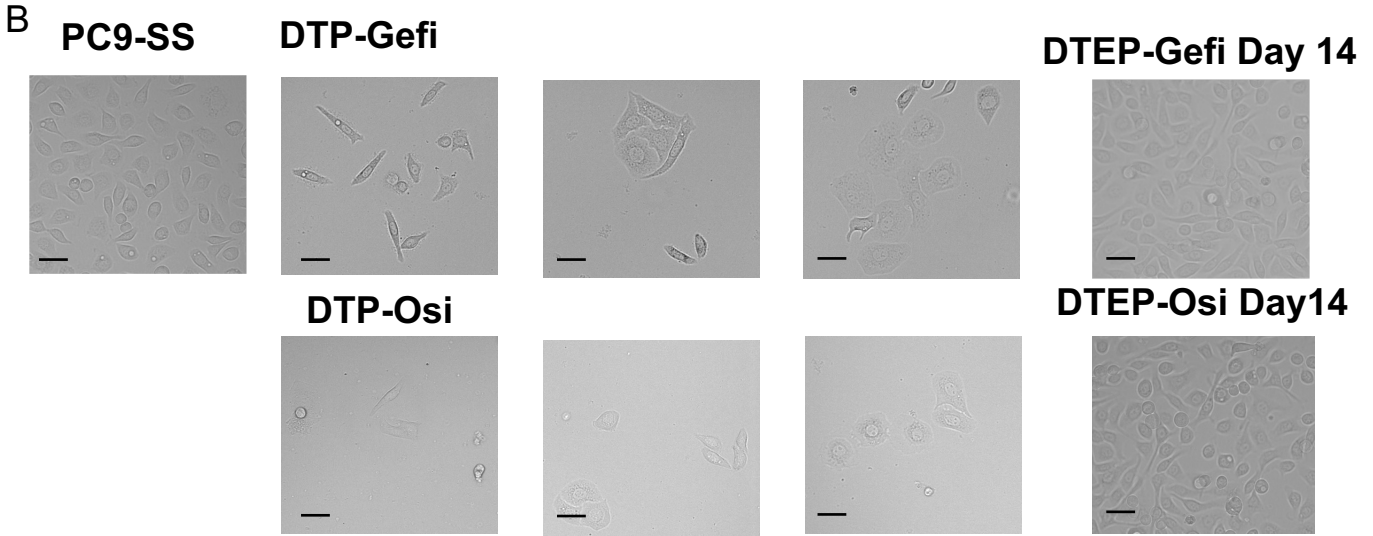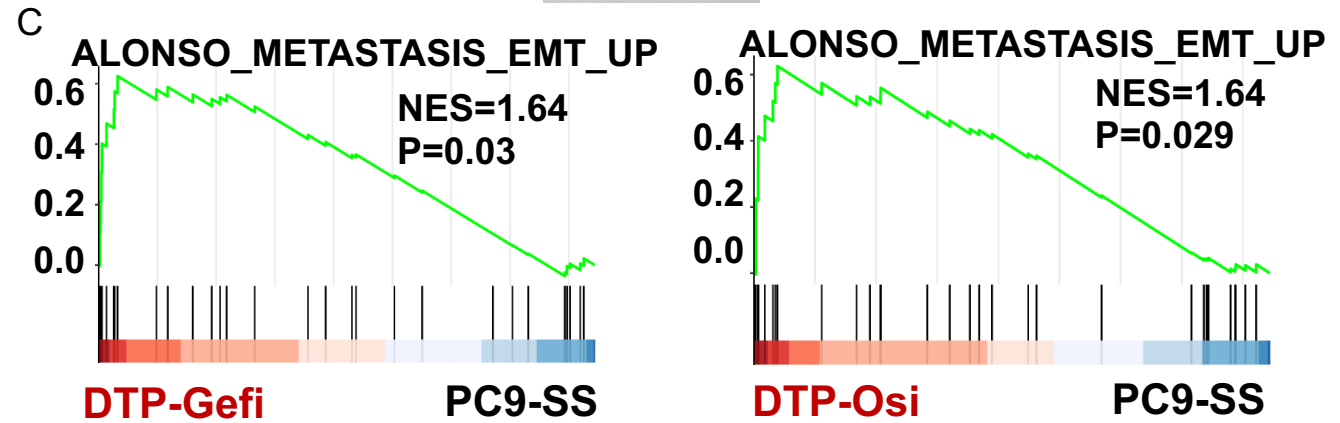

**D**

| IC50     | PC9-SS<br>Gefitinib | PC9-SS<br>Osimertinib | GTL-16<br>Crizotinib | A375<br>Dabra+Trame | H358<br>AMG510 |
|----------|---------------------|-----------------------|----------------------|---------------------|----------------|
| Parental | 71.23nM             | 21.08nM               | 117.4nM              | 11.49nM             | 16.42nM        |
| DTEP     | 89.18nM             | 27.90nM               | 193.3nM              | 12.227nM            | 16.42nM        |

Figure S1. Persisters induction and purification in PC9, A375, GTL16 and H358. Related to Figures 1 and 2. (A) Five-day dose-response curve of DTPs and DTEPs to corresponding EGFR inhibitors. Error bars represent mean  $\pm$  s.d.,  $n = 3$  independent experiments. Statistical significance was calculated by two-tailed Student's t-test. (B) Representative images of morphologies for Parental, DTP and DTEPs in PC9. Black scale bars, 50  $\mu$ m. (C) GSEA analysis for EMT signature enrichment in DTPs in comparison with parental PC9 cells. (D) IC50 values to standard of care therapy in paired parental and DTEPs derived from PC9, GTL-16, A375 and H358. Days for culturing after drug wash out were 21, 30 and 14 for DTEPs derived from GTL-16, A375 and H358 accordingly. IC50, half-maximum inhibitory concentration.

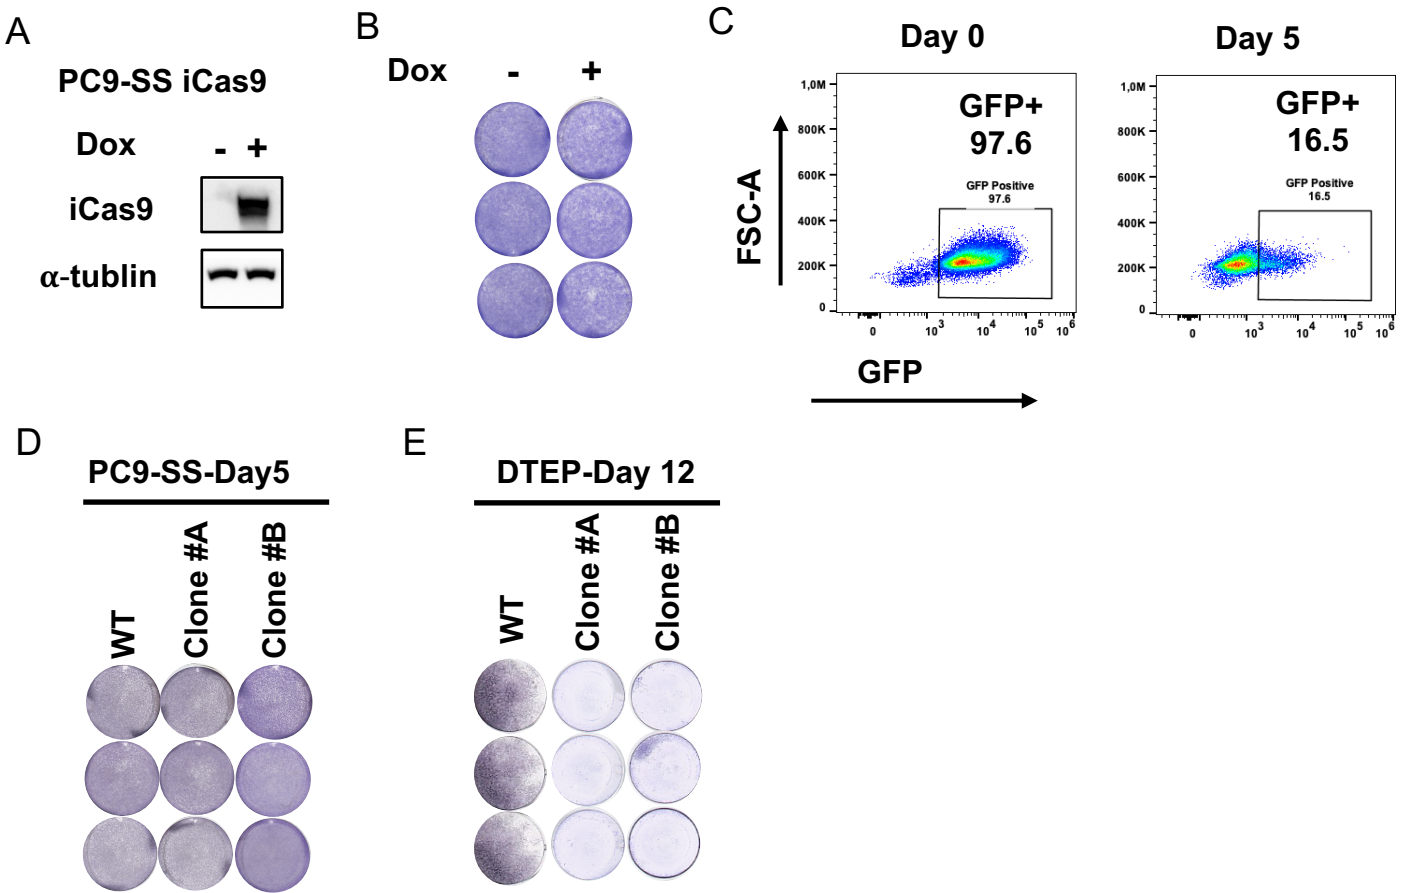

Figure S2. BRD2 knockout abolished the outgrowth of DTPs into DTEPs while had minor effect on proliferation of parental PC9 cells. Related to Figure 1. (A) Western blot detection of Cas9 expression after 24h Dox (doxycycline) treatment ( $1\mu\text{g ml}^{-1}$ ). (B) Colony formation assay for PC9-SS iCas9 cells after 5 days Dox treatment ( $1\mu\text{g ml}^{-1}$ ). Replicates were performed for each group. (C) Editing efficiency detection reflected by percentage of GFP positive cells after 10 days Dox treatment ( $1\mu\text{g ml}^{-1}$ ). (D) Colony formation for WT and BRD2 knockout clones of PC9. Collected at day 5. (E) Long-term colony formation for WT and BRD2 knockout DTEPs induced by Osimertinib. Collected at day 12. Replicates were performed for each group.

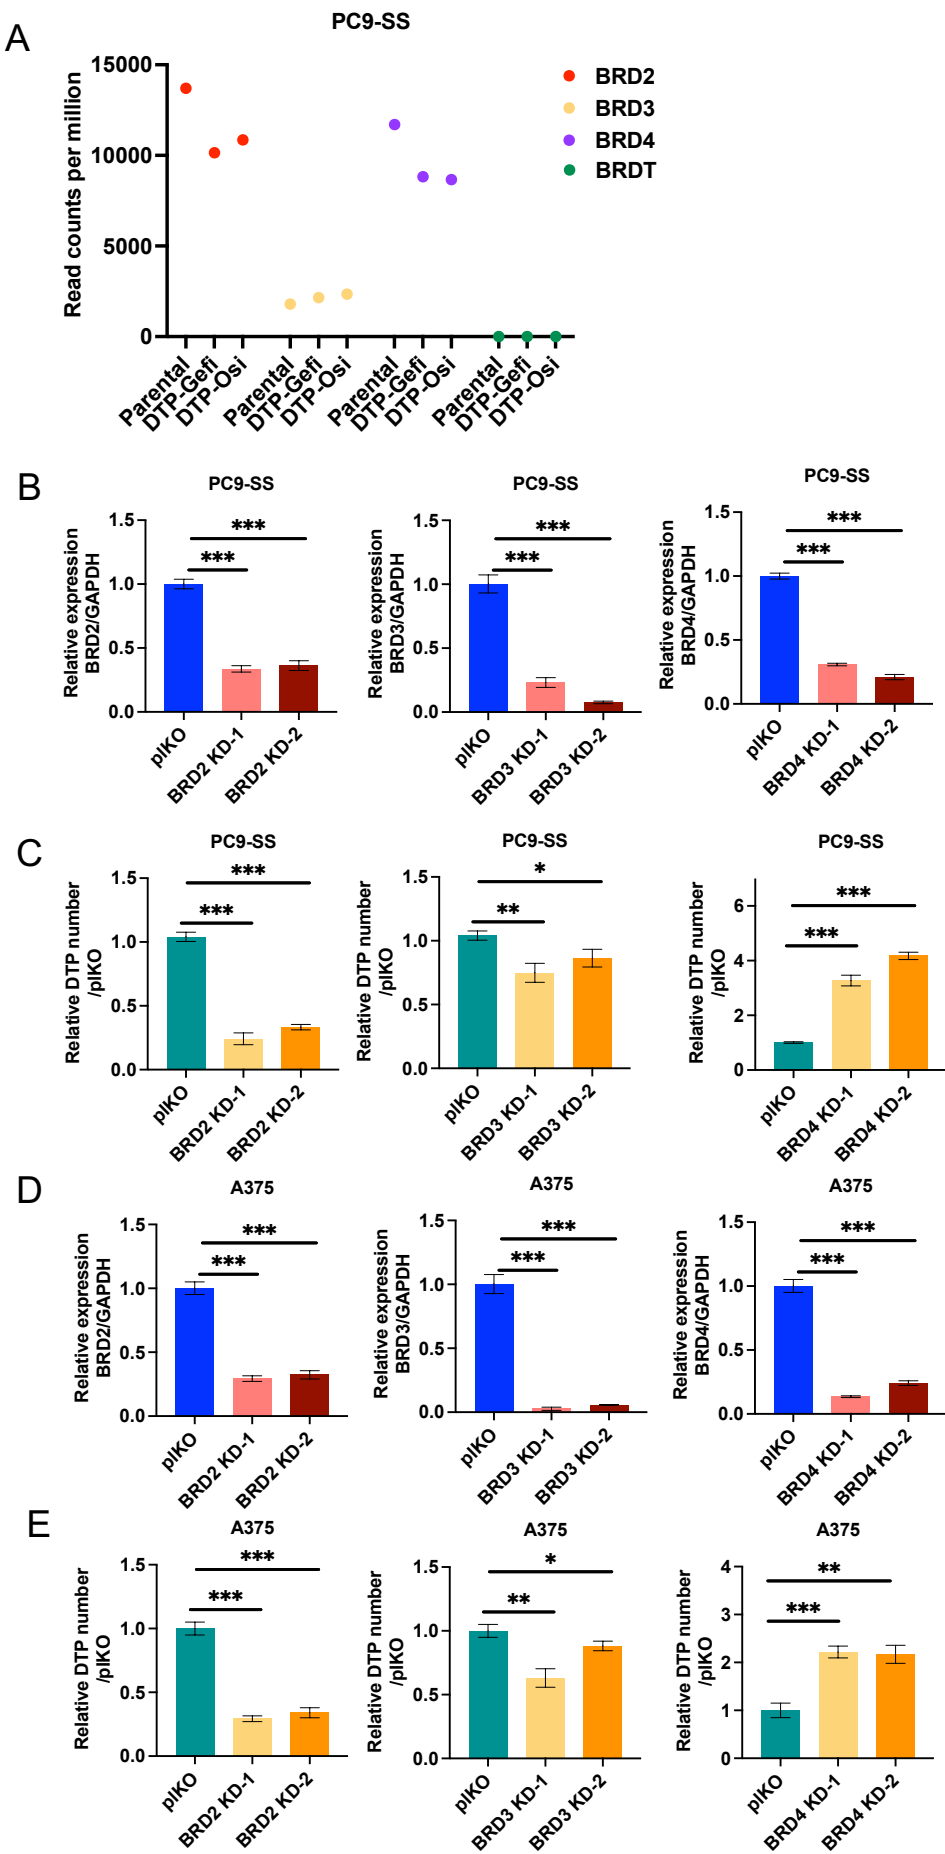

Supplementary Figure 3. DTP formation analysis in BRD2-4 knockdown cells in PC9 and A375. Related to Figures 1 and 2. (A) Read counts per million for BRD2-4 and BRDT in parental PC9, DTP-Gefi and DTP-Osi. (B) Knockdown efficiency of BRD2-4 by qRT-PCR in PC9. (C) DTP formation analysis in BRD2-4 knockdown groups as compared to pIKO in PC9. (D) Knockdown efficiency of BRD2-4 by qRT-PCR in A375. (E) DTP formation analysis in BRD2-4 knockdown groups as compared to pIKO in A375. Error bars in B-E represent mean  $\pm$  s.d.,  $n = 3$  independent experiments. Statistical significance was calculated by two-tailed Student's t-test (\* $P \leq 0.05$ , \*\*  $P \leq 0.01$ , \*\*\*  $P \leq 0.001$ ).



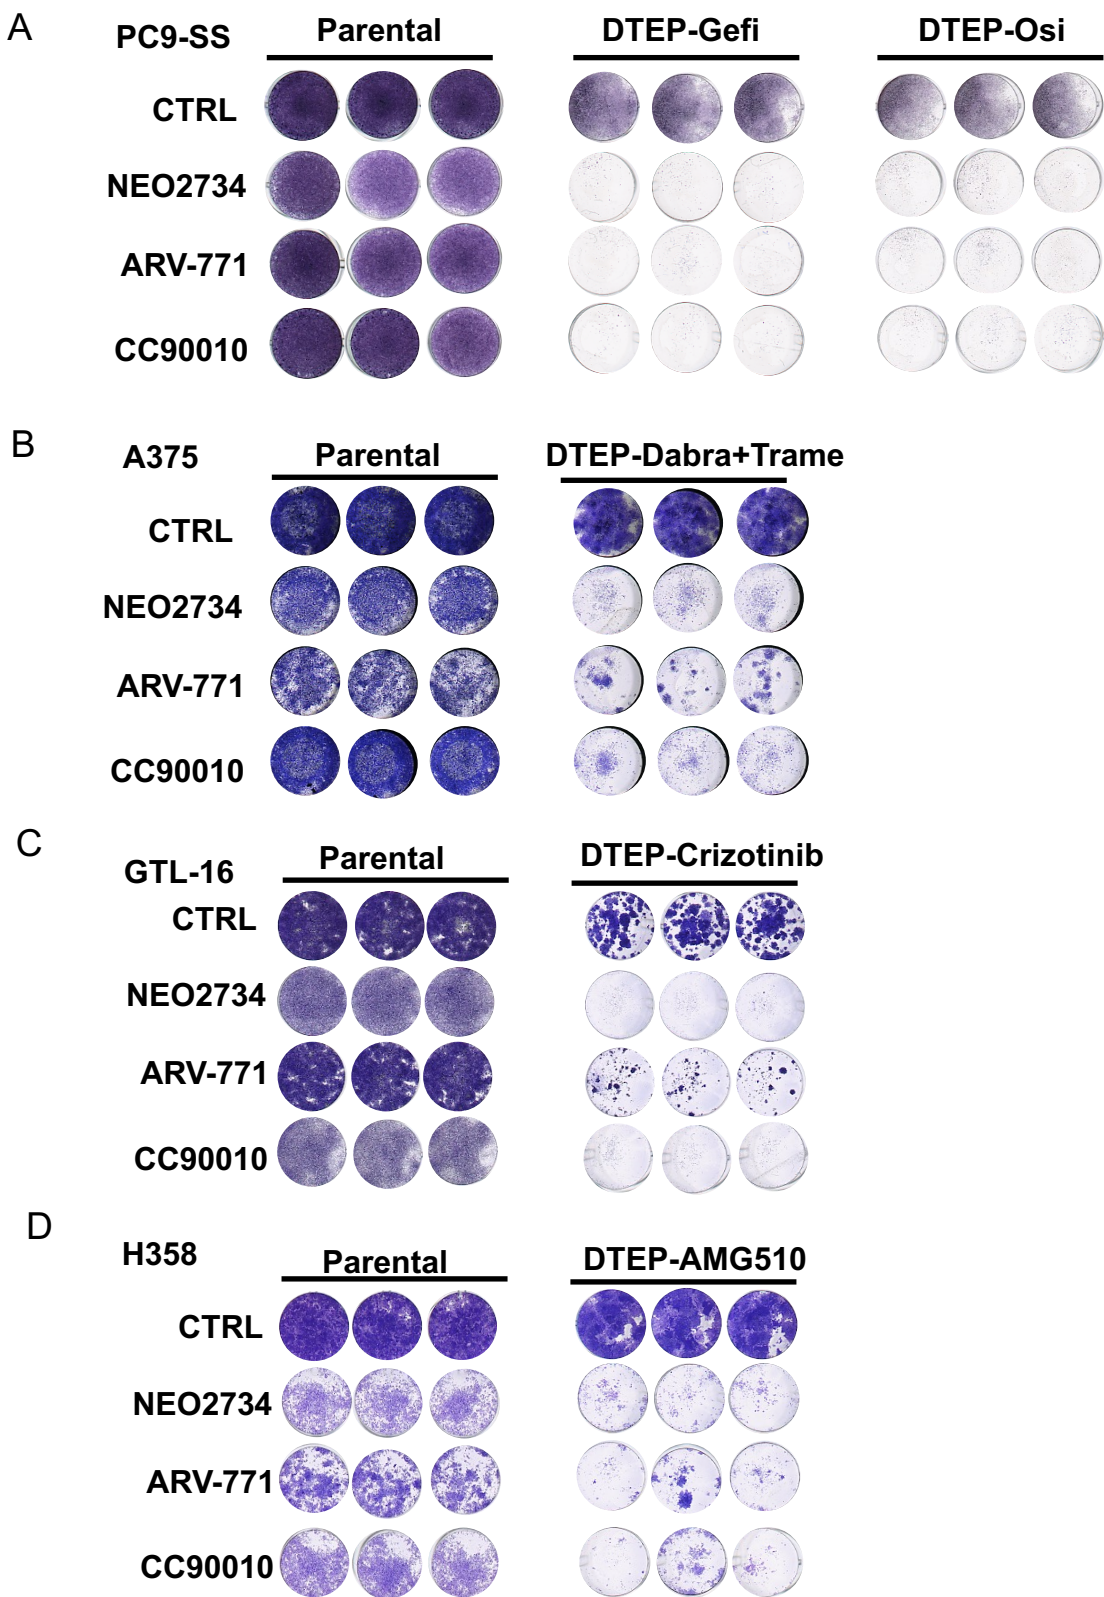

Figure S4. BET inhibitors suppress DTEPs validated by long-term colony formation assay. Related to Figures 1 and 2. (A-D) Long-term colony formation assay for paired parental and persisters from PC9, A375, GTL-16 and H358 treated with three BET inhibitors NEO2734, ARV-771 and CC90010. Parental were collected at Day 5. DTEPs were collected at day 12 except for GTL-16 collected at Day 21 (NEO2734: 0.08 $\mu$ M; ARV-771: 0.08 $\mu$ M; CC90010: 0.08 $\mu$ M). Replicates were performed for each group.

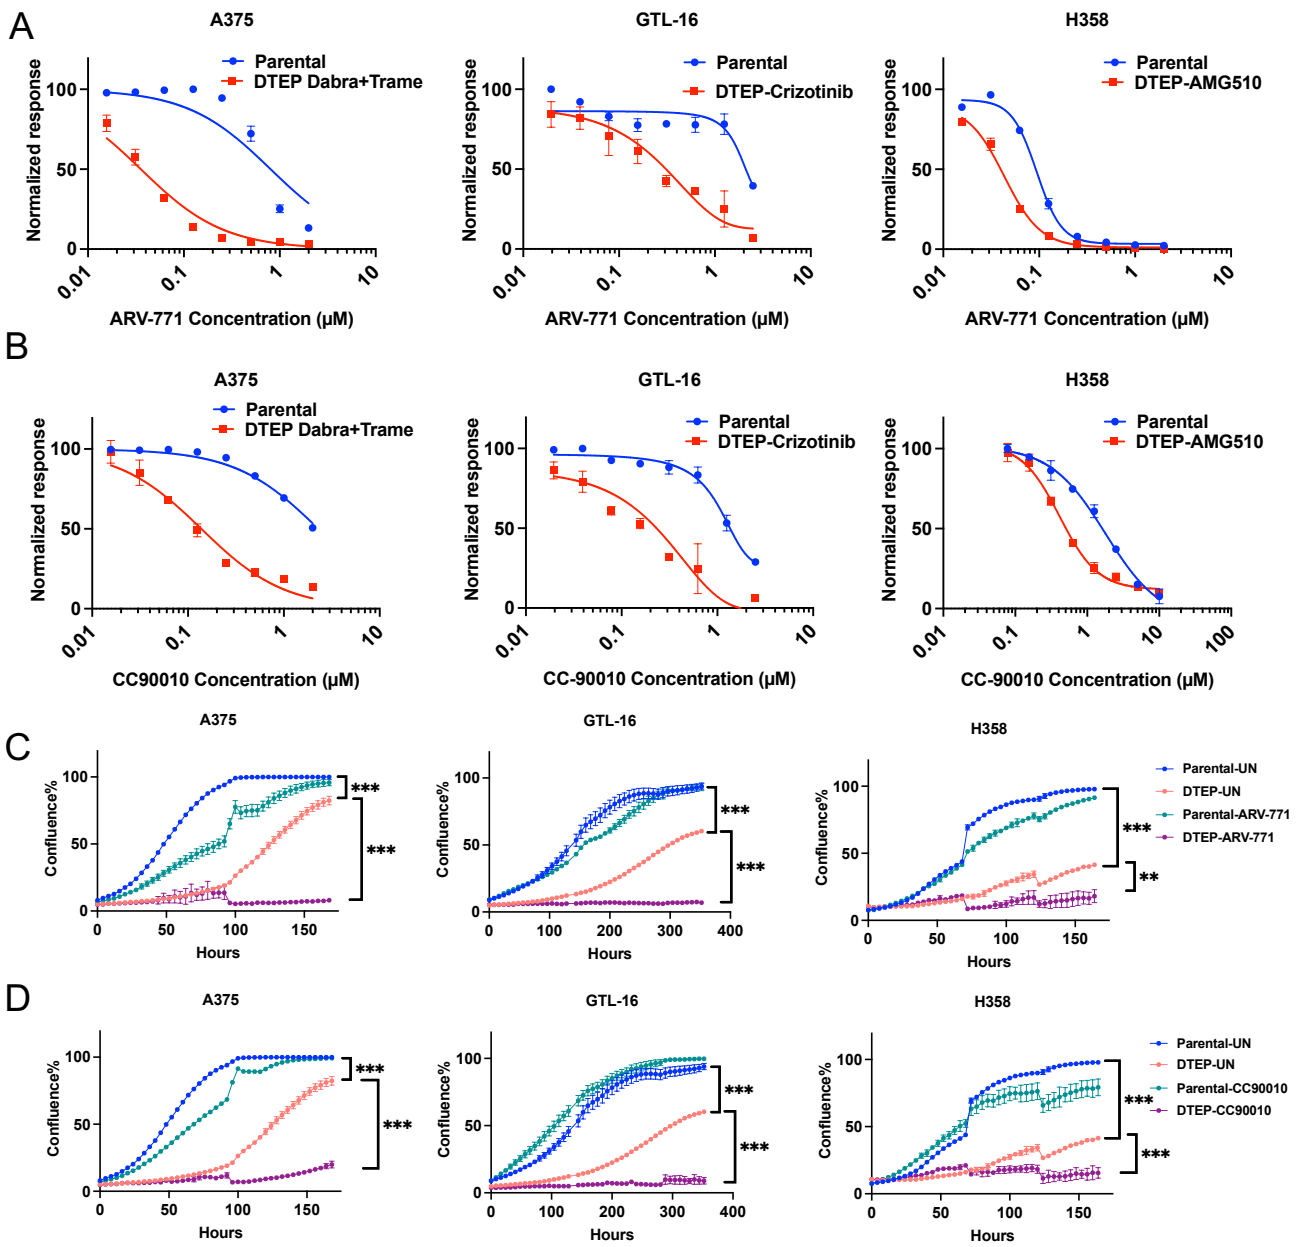

Figure S5. BET inhibitors suppress DTEPs validated by cell viability and incuocyte growth monitoring. Related to Figure 2. (A) Five-day dose-response curve for paired parental and persisters from A375, GTL-16 and H358 to DMSO or BET inhibitor ARV-771. (B) Five-day dose-response curve for paired parental and persisters from A375, GTL-16 and H358 to DMSO or BET inhibitor CC90010. (C) Incuocyte proliferation for paired parental and persisters from A375, GTL-16 and H358 treated with DMSO or ARV-771 (NEO2734:  $0.08\mu\text{M}$ ; ARV-771:  $0.08\mu\text{M}$ ; CC90010:  $0.08\mu\text{M}$ ). (D) Incuocyte proliferation for paired parental and persisters from A375, GTL-16 and H358 treated with DMSO or CC90010 (NEO2734:  $0.08\mu\text{M}$ ; ARV-771:  $0.08\mu\text{M}$ ; CC90010:  $0.08\mu\text{M}$ ). Error bars in A-D represent mean  $\pm$  s.d.,  $n = 3$  independent experiments. Statistical significance was calculated by two-tailed Student's t-test (\* $P \leq 0.05$ , \*\*  $P \leq 0.01$ , \*\*\*  $P \leq 0.001$ ).

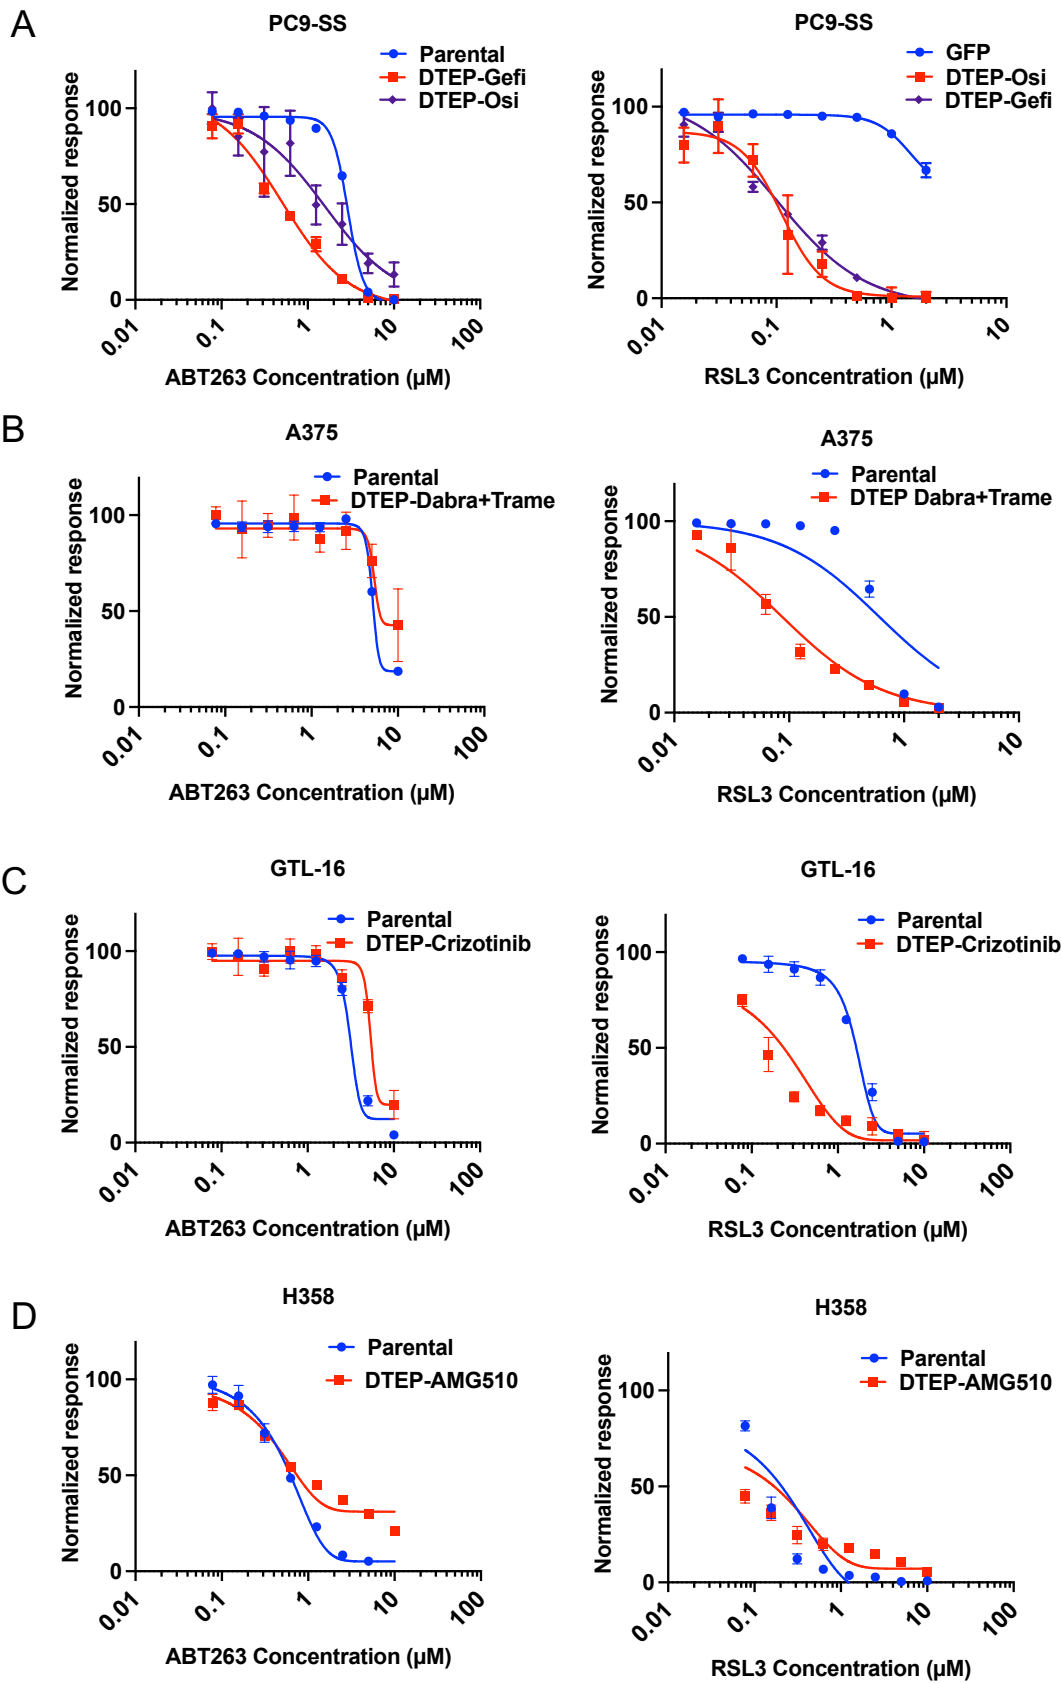

Figure S6. ABT263 selectively eliminated persisters derived from EGFPi induced PC9. No therapeutic window was observed from H358 treated with RSL3. Related to Figures 1 and 2. (A-D) Five-day dose response curve for paired parental and persisters from PC9, A375, GTL-16 and H358 to Bcl family inhibitor ABT263 and GPX4 inhibitor RSL3. Error bars in A-D represent mean  $\pm$  s.d.,  $n = 3$  independent experiments. Statistical significance was calculated by two-tailed Student's *t*-test.

A

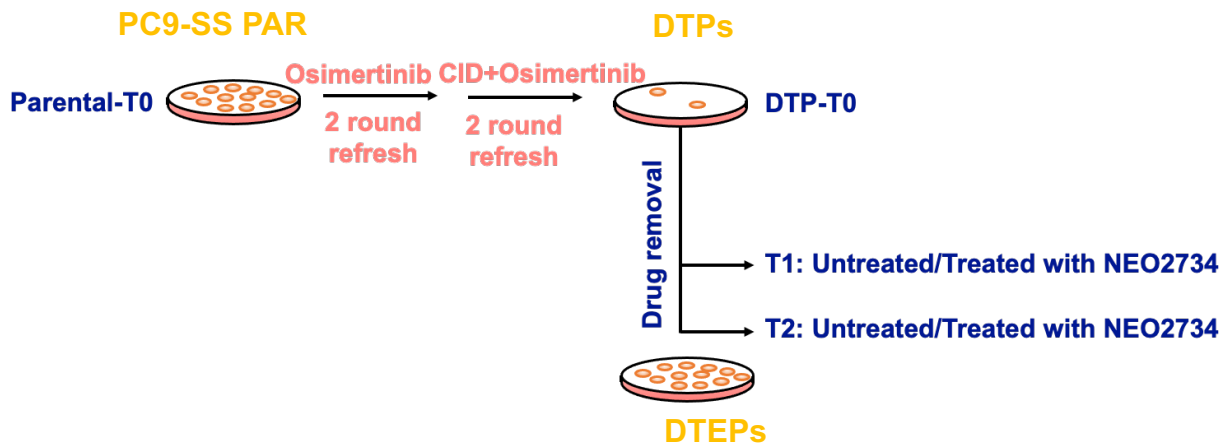

B

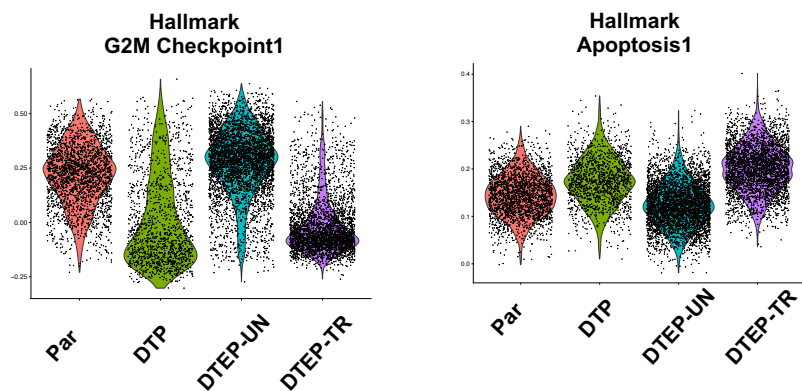

C

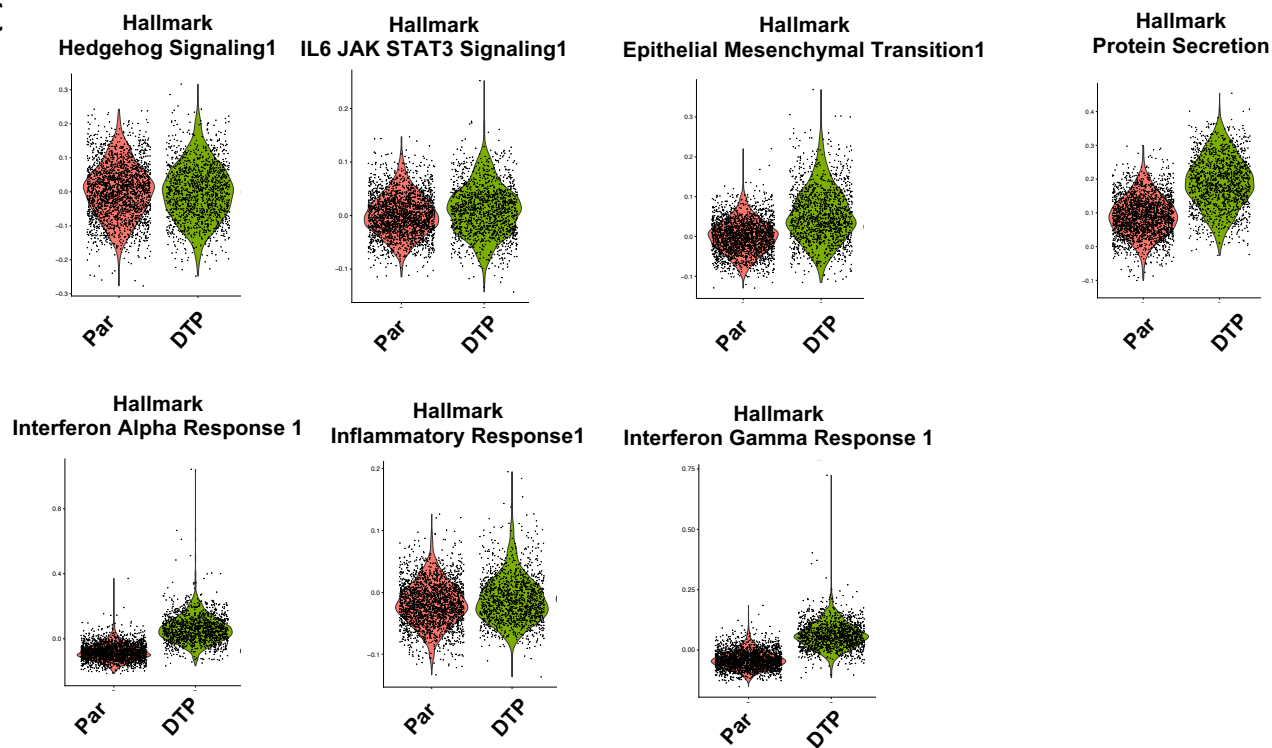

Figure S7. scRNA seq uncovered different gene signature in persisters. Related to Figure 3. (A) Graphic description of scRNA seq sample preparations. (B) Dynamic changes for G2M checkpoint and apoptosis observed in parental, DTP, DTEP and DTEP treated with NEO2734. (C) Representative gene signatures identified in DTPs.

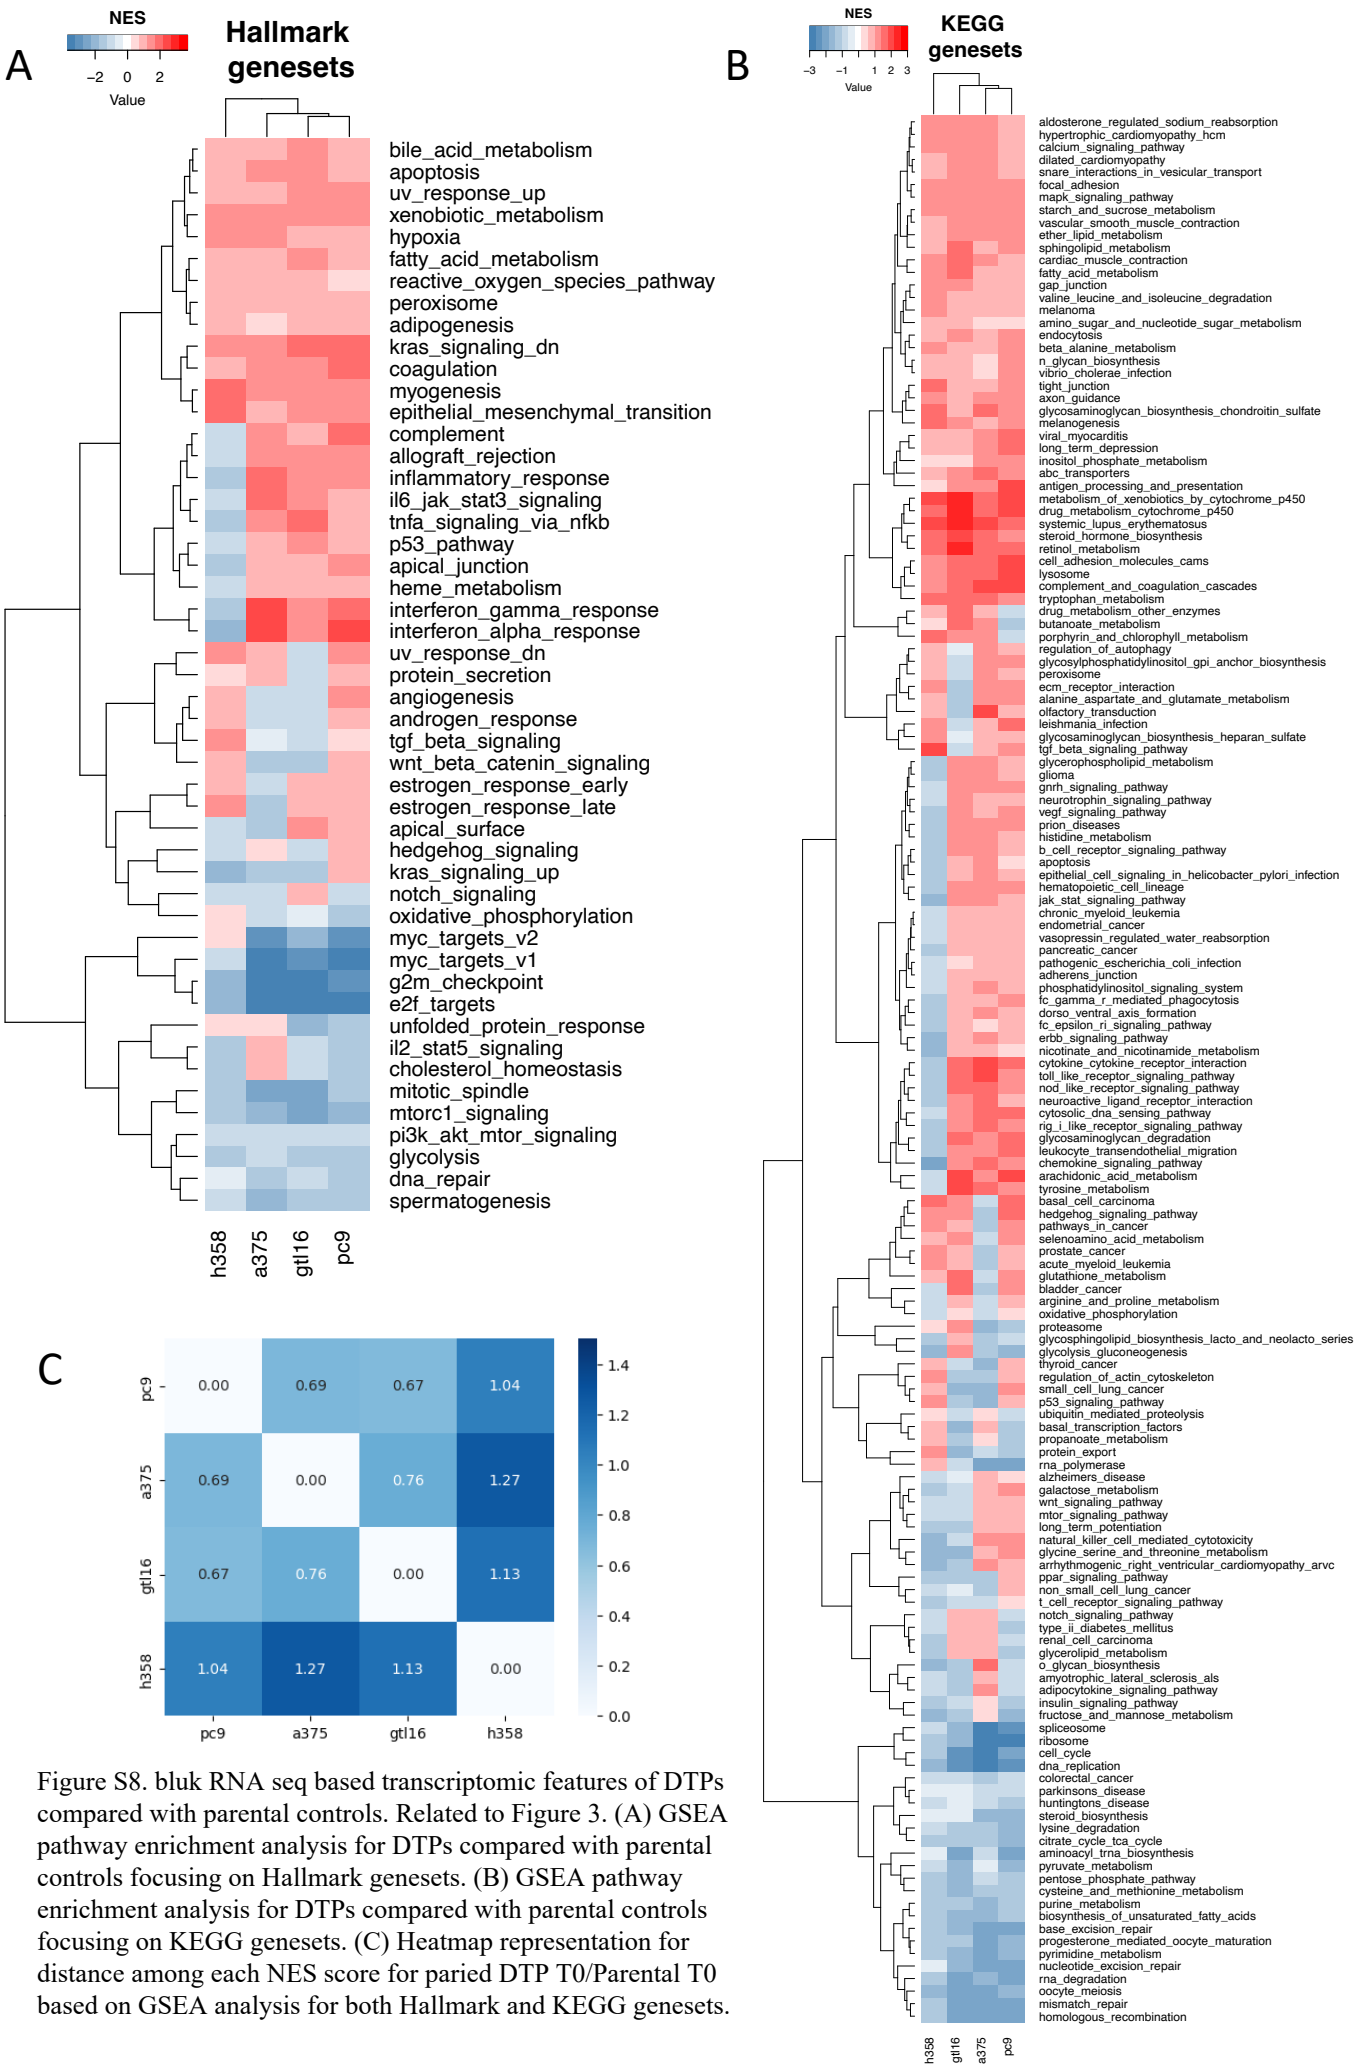

Figure S8. bluk RNA seq based transcriptomic features of DTPs compared with parental controls. Related to Figure 3. (A) GSEA pathway enrichment analysis for DTPs compared with parental controls focusing on Hallmark genesets. (B) GSEA pathway enrichment analysis for DTPs compared with parental controls focusing on KEGG genesets. (C) Heatmap representation for distance among each NES score for paired DTP T0/Parental T0 based on GSEA analysis for both Hallmark and KEGG genesets.



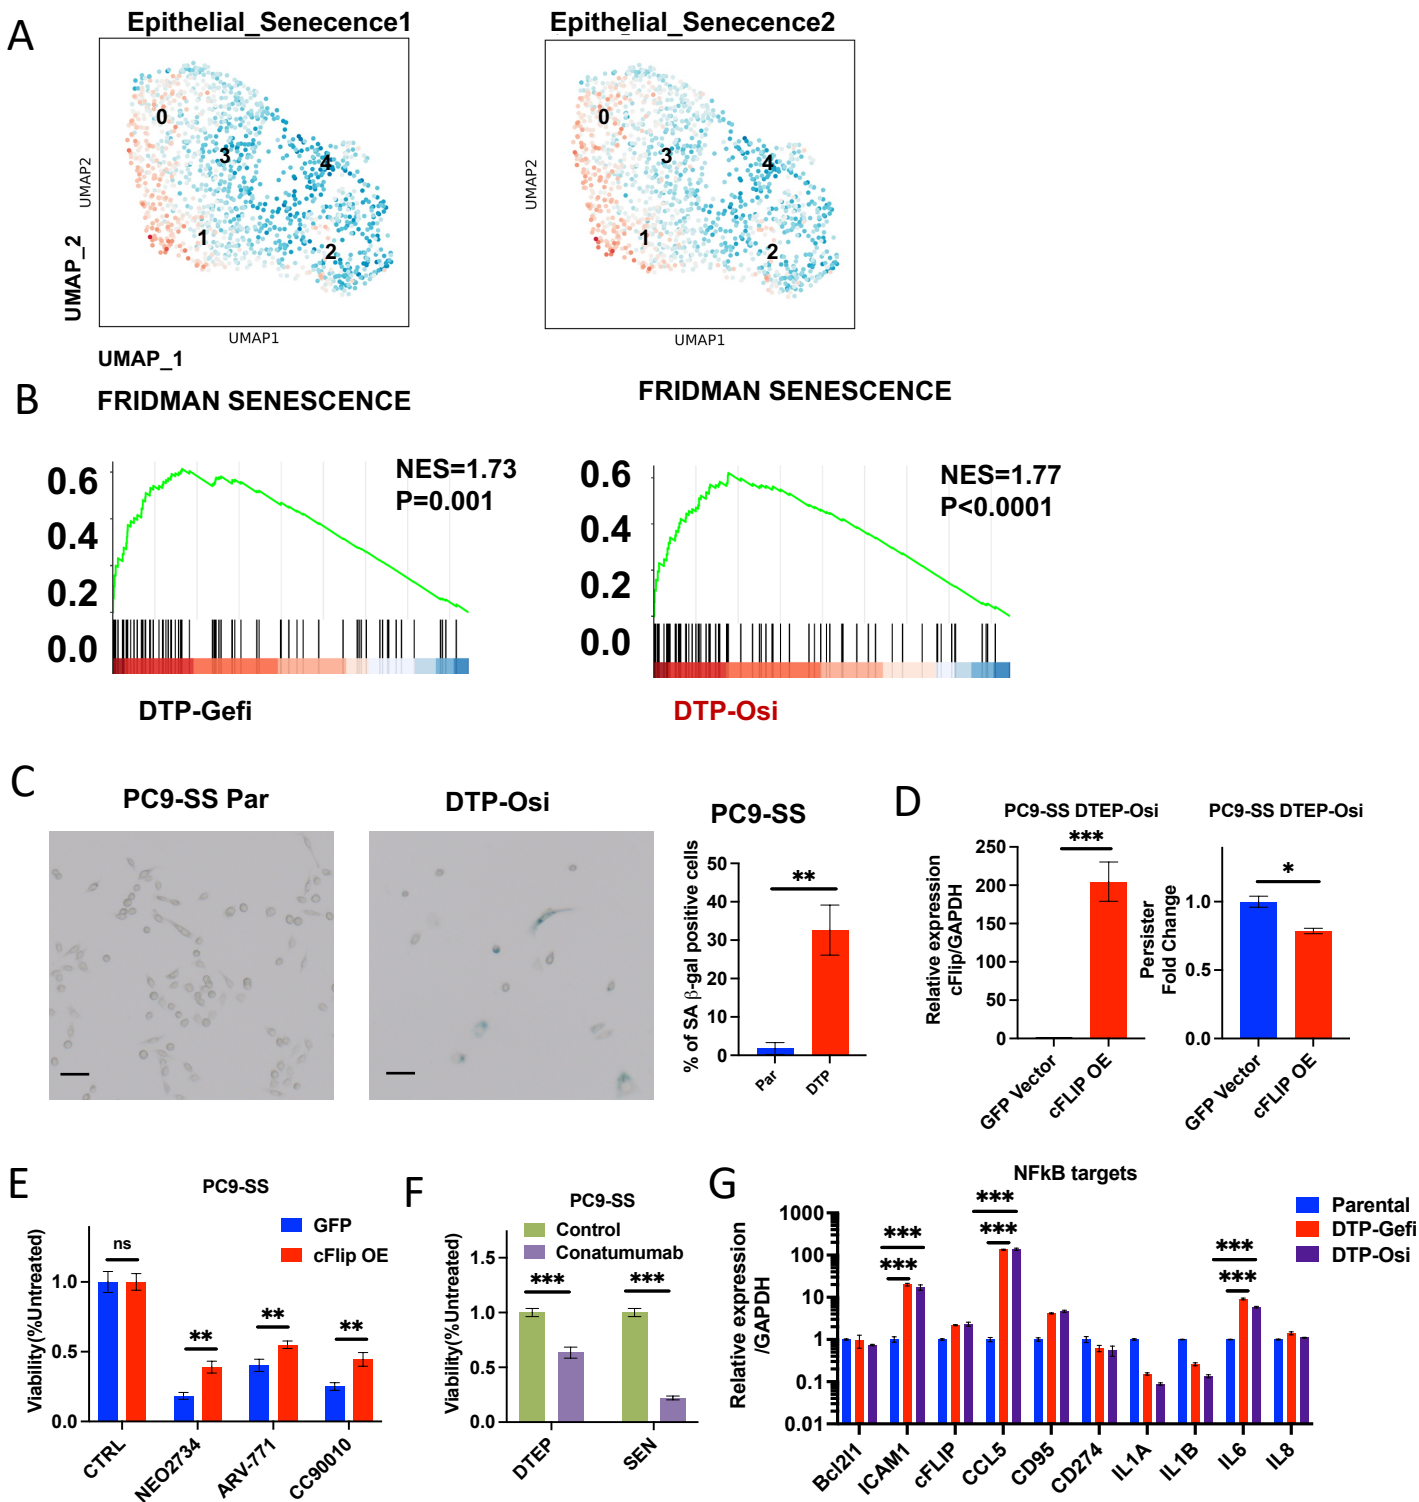

Figure S9. DTPs share some similarities with senescence cells but have different vulnerabilities. Related to Figure 3. (A) Senescence signature geneset modula score within DTPs. Two epithelial senescence signatures were tested. (B) GSEA analysis for senescence gene signature in DTPs in comparison with parental PC9 cells based on bulk-RNA seq. (C) Senescence-associated  $\beta$ -galactosidase (SA- $\beta$ -Gal) staining of cells. Left: Representative image; Right: Quantification of left. Black scale bars, 50  $\mu$ m. (D) cFLIP overexpression efficiency detected by qPCR. Persistier cells calculation compared to GFP control. (E) Relative viabilities of DTEPs from GFP and cFLIP<sup>OE</sup> PC9 treated with three BET inhibitors. NEO2734: 0.08 $\mu$ M; ARV-771: 0.08 $\mu$ M; CC90010: 0.08 $\mu$ M. (F) Relative viabilities of DTEPs and senescent cells from GFP and cFLIP<sup>OE</sup> PC9 treated with Conatumumab. Conatumumab:125ng/ml. (G) Transcriptomic analysis of NF- $\kappa$ B targets in parental PC9, DTP-Gefi and DTP-Osi. Error bars in C-G represent mean  $\pm$  s.d., n = 3 independent experiments. Statistical significance was calculated by two-tailed Student's t-test (\*P  $\leq$  0.05, \*\* P  $\leq$  0.01, \*\*\* P  $\leq$  0.001).

A

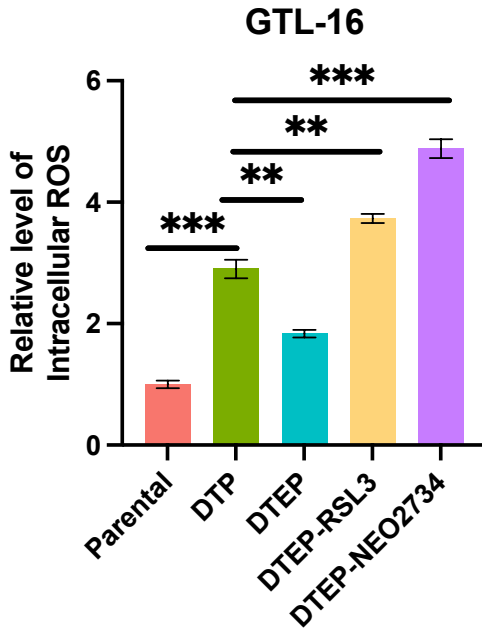

B

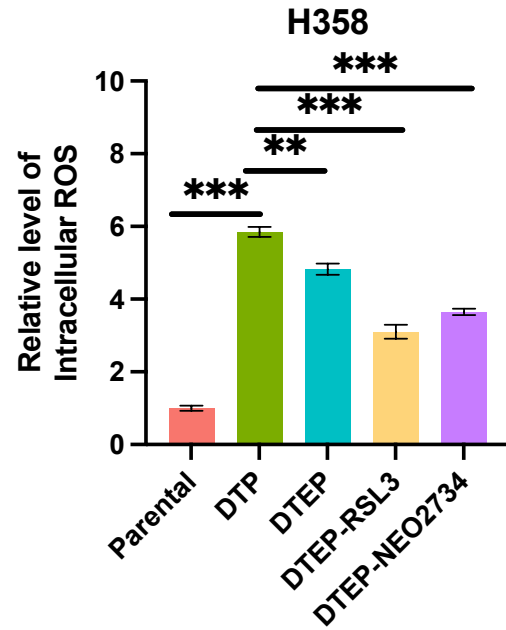

C

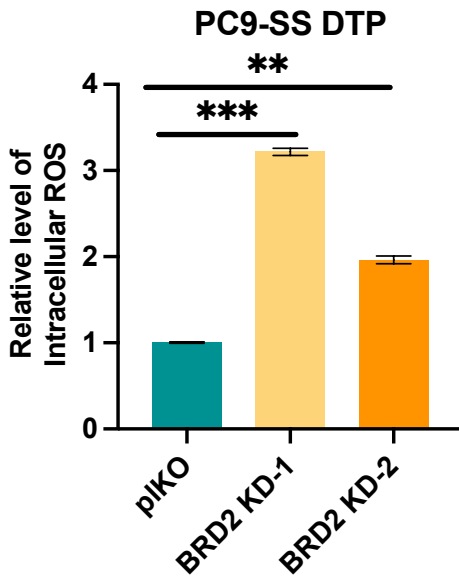

D

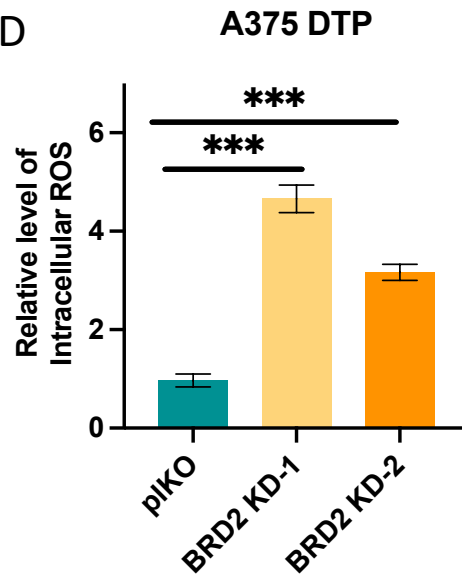

Figure S10. Intracellular ROS staining by flow cytometry in GTL-16 and H358. Related to Figures 4 and 5. (A) Quantifications of intracellular ROS level (mean fluorescent intensity) in parental GTL-16, DTP, DTEP and DTEP challenged with RSL3 and NEO2734. (B) Quantifications of intracellular ROS level (mean fluorescent intensity) in parental H358, DTP, DTEP and DTEP challenged with RSL3 and NEO2734. (C) Quantifications of intracellular ROS level (mean fluorescent intensity) of DTPs from BRD2 knockdown cells compared to pIKO cells in PC9-SS. (D) Quantifications of intracellular ROS level (mean fluorescent intensity) of DTPs from BRD2 knockdown cells compared to pIKO cells in PC9-SS. Error bars in A-D represent mean  $\pm$  s.d.,  $n=3$  independent experiments. Statistical significance was calculated by two-tailed Student's t-test (\* $P \leq 0.05$ , \*\*  $P \leq 0.01$ , \*\*\*  $P \leq 0.001$ ).

A

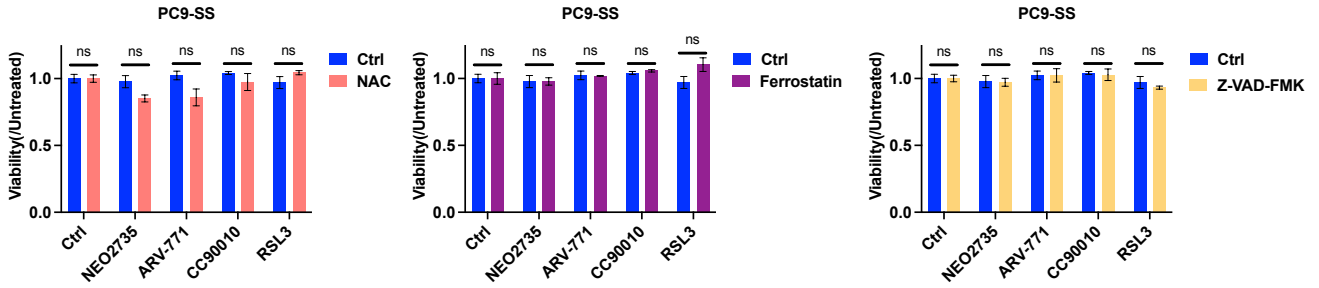

B

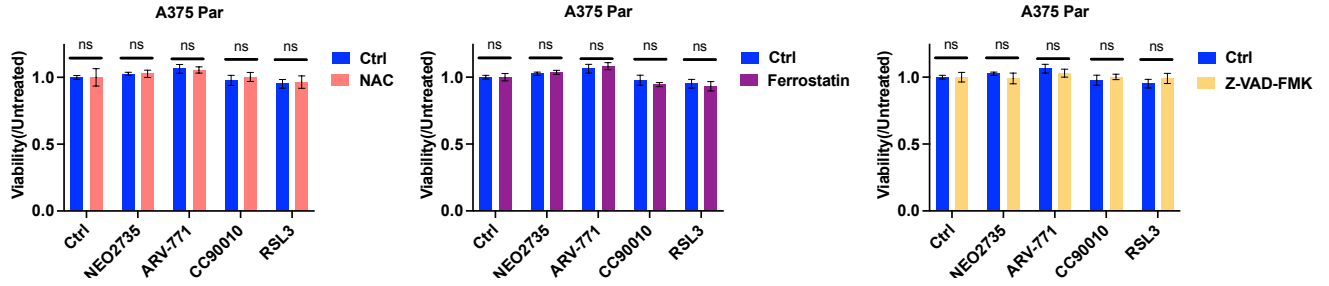

C

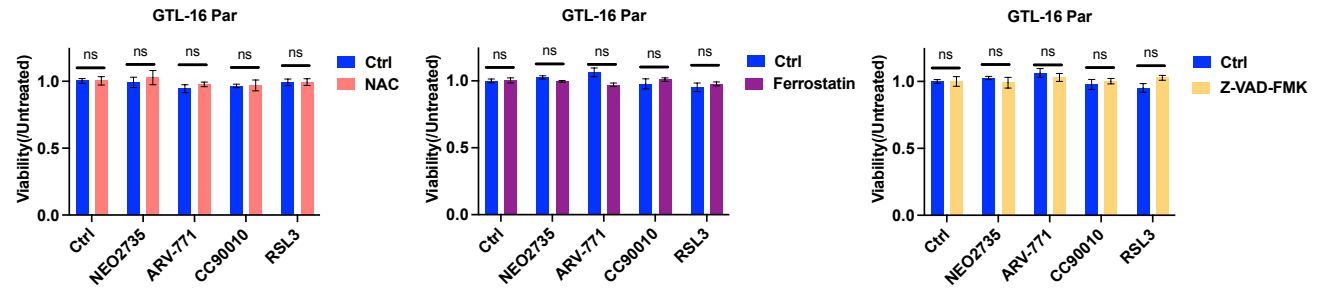

D

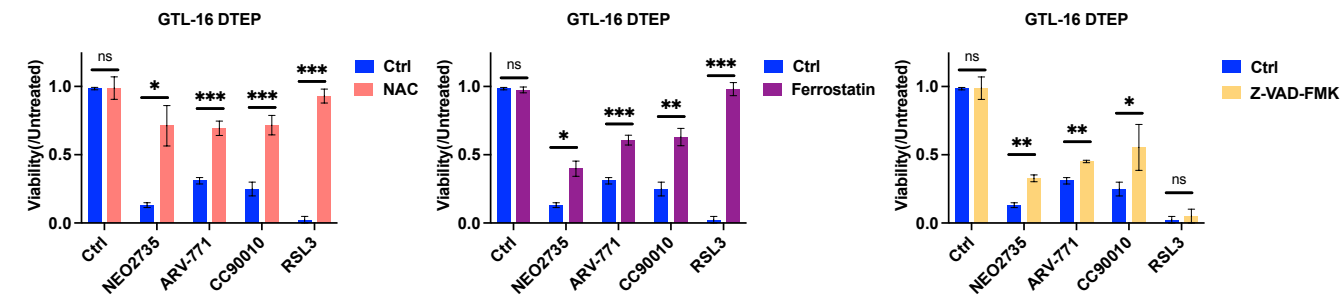

Figure S11. Rescue experiments by NAC, Ferrostatin and Z-VAD-FMK in PC9, A375 and GTL-16 derived DTEPs treated with BET inhibitors. Related to Figures 4 and 5. (A) Relative cell viabilities of parental PC9 treated with NEO2734, ARV-771, CC90010 and RSL3 cultured with or without NAC, Ferrostatin and Z-VAD-FMK. (B) Relative cell viabilities of parental A375 treated with NEO2734, ARV-771, CC90010 and RSL3 cultured with or without NAC, Ferrostatin and Z-VAD-FMK. (C) Relative cell viabilities of parental GTL-16 treated with NEO2734, ARV-771, CC90010 and RSL3 cultured with or without NAC, Ferrostatin and Z-VAD-FMK. (D) Relative cell viabilities of DTEP derived from GTL-16 treated with NEO2734, ARV-771, CC90010 and RSL3 cultured with or without NAC, Ferrostatin and Z-VAD-FMK (NEO2734: 0.25 $\mu$ M; ARV-771: 0.25 $\mu$ M; CC90010: 0.25 $\mu$ M; NAC: 2.5mM; Ferrostatin: 2.5 $\mu$ M; Z-VAD-FMK: 10 $\mu$ M). Error bars in A-D represent mean  $\pm$  s.d., n = 3 independent experiments. Statistical significance was calculated by two-tailed Student's t-test (\* $P \leq 0.05$ , \*\*  $P \leq 0.01$ , \*\*\*  $P \leq 0.001$ ).



**A**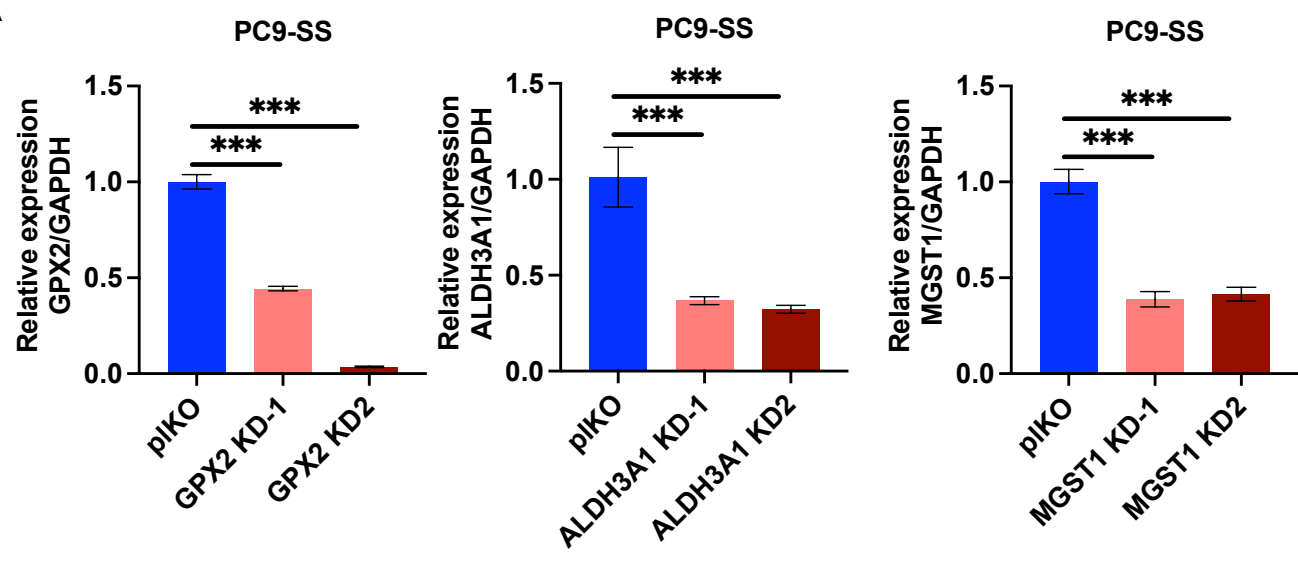**B**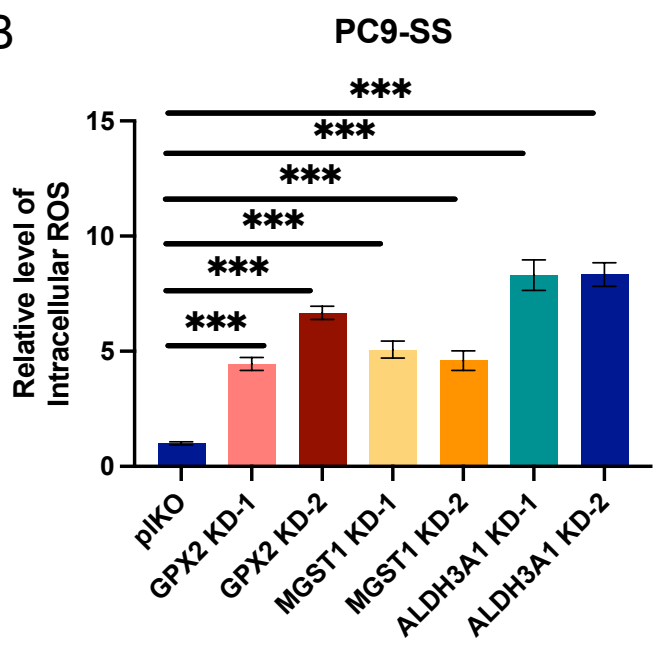

Figure S12. ROS level of DTPs were increased upon knockdown of GPX2, ALDH3A1 and MGST1. Related to Figure 5. (A) Knockdown efficiency of GPX2, MGST1 and ALDH3A1 in PC9-SS by q-PCR. (B) Quantification of intracellular ROS levels (mean fluorescent intensity) of DTPs in pIKO, GPX2 KD-1, GPX2-KD2, MGST 1 KD-1, MGST1 KD-2, ALDH3A1 KD-1 and ALDH3A1 KD-2. Error bars in A-B represent mean  $\pm$  s.d., n = 3 independent experiments. Statistical significance was calculated by two-tailed Student's t-test (\* $P \leq 0.05$ , \*\*  $P \leq 0.01$ , \*\*\*  $P \leq 0.001$ ).

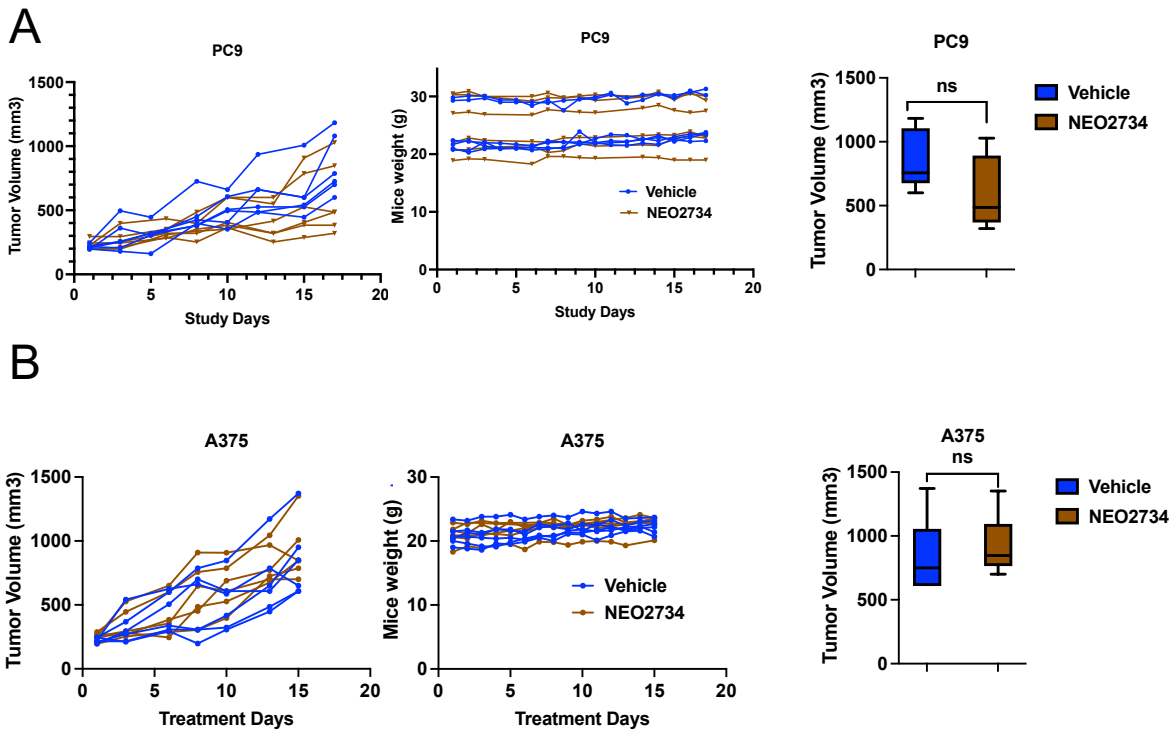

Figure S13. BET inhibitor has minor effect on controlling parental cancer proliferation in vivo. Related to Figure 6. (A) Relative tumor volumes and mice weight for PC9 subcutaneous bearing mice treated with vehicle, NEO2734 (n=6 for each group). (B) Relative tumor volumes and mice weight for A375 subcutaneous bearing mice treated with vehicle, NEO2734 (n=6 for each group). Data are presented as mean  $\pm$  s.e.m. Two-way analysis of variance (ANOVA) was applied for the in vivo study statistical analysis (\* $P \leq 0.05$ , \*\*  $P \leq 0.01$ , \*\*\*  $P \leq 0.001$ ).

Table S2. List of DTP markers and their expression changes in DTEPs upon NEO2734 treatment. Related to Figure 3.

| DTP markers | Log2 FC(DTEP TR/UN) | Aver_Differ |
|-------------|---------------------|-------------|
| ALDH3A1     | -4,24792751         | 1,89131446  |
| CYP1B1      | -3,86882918         | 10,2313782  |
| LYPD6B      | -2,37178861         | 23,6253318  |
| GPX2        | -2,15881489         | 11,0704595  |
| FN1         | -1,88328188         | 5,21058898  |
| ALPP        | -1,7684921          | 8,15688063  |
| S100P       | -1,75822321         | 4,73060596  |
| CCDC80      | -1,58230944         | 6,14430032  |
| SERPINB5    | -1,495077           | 4,03732768  |
| VGLL1       | -1,47196457         | 5,11506143  |
| MGST1       | -1,3721061          | 2,78435996  |
| FXD3        | -1,32192809         | 16,7187148  |
| IGFBP3      | -1,32125574         | 6,83528438  |
| FBP1        | -1,30142978         | 12,4883401  |
| ARHGDI1     | -1,17023692         | 11,0335559  |
| RBM47       | -1,12890212         | 24,5836547  |
| TPD52L1     | -1,12657188         | 5,84317502  |
| CXXC5       | -0,94981424         | 7,57707816  |
| TNS3        | -0,91737317         | 18,3930842  |
| RPL37       | -0,87334095         | 0,74569086  |
| CAMK2N1     | -0,78580473         | 17,7801061  |
| GNAQ        | -0,78300339         | 12,346179   |
| PCDH7       | -0,77356121         | 7,18389647  |
| PLS3        | -0,71814063         | 7,81059494  |
| TNFAIP2     | -0,68492254         | 8,1285217   |
| MAL         | -0,67855938         | 18,0648175  |
| PRXL2A      | -0,67719781         | 4,61986633  |
| TMEM45B     | -0,60847331         | 6,9806803   |
| MARCKS      | -0,57872439         | 9,97916452  |
| LIMCH1      | -0,53476096         | 11,1598565  |
| CDKN2A      | -0,49811924         | 15,1279592  |
| LCN2        | -0,48433738         | 2,93410644  |
| CAMK2G      | -0,46497628         | 16,2216722  |
| CTSD        | -0,4358519          | 0,19504952  |
| CTSH        | -0,38861432         | 5,82573071  |
| RPS12       | -0,38145905         | 0,36583016  |
| SKIL        | -0,35361539         | 10,7074503  |
| TMEM139     | -0,2833068          | 13,8833255  |
| ATXN10      | -0,27397375         | 6,04671629  |
| PLAAT3      | -0,22948185         | 10,6750645  |
| MUC20       | -0,15600502         | 6,74053935  |

|          |             |            |
|----------|-------------|------------|
| DAPK1    | -0,10568917 | 14,3203738 |
| PSCA     | -0,03783207 | 6,56881003 |
| PDLIM1   | 0,09297777  | 17,0282715 |
| SH3YL1   | 0,13521414  | 10,1606966 |
| EZR      | 0,18473501  | 4,89626196 |
| FBLN1    | 0,22287053  | 8,47485305 |
| ANXA4    | 0,23157893  | 8,29378063 |
| PDGFD    | 0,24259765  | 11,3406825 |
| TSTD1    | 0,24392558  | 12,0886066 |
| MT-CO3   | 0,25691449  | 6,64883653 |
| PCSK5    | 0,47978787  | 5,54494723 |
| SEMA5A   | 0,48122412  | 9,11149452 |
| GSTK1    | 0,5687882   | 21,7718524 |
| JDP2     | 0,56889181  | 14,031336  |
| SPINT2   | 0,57939187  | 1,48930862 |
| CD9      | 0,62002364  | 4,84567969 |
| MAN1A1   | 0,74029976  | 18,6314181 |
| QPRT     | 0,80279664  | 15,2491275 |
| ASAH1    | 0,85656868  | 9,81037049 |
| KRT7     | 0,86098473  | 2,181738   |
| LGALS3   | 0,98274867  | 20,0718399 |
| KRT19    | 1,12169516  | 1,4909795  |
| GABARAP  | 1,14438991  | 4,29122683 |
| MYH14    | 1,16021737  | 24,5180585 |
| TRAPPC6A | 1,17632277  | 8,29220981 |
| CD24     | 1,24603979  | 15,6185246 |
| TACSTD2  | 1,258863    | 3,34741067 |
| TMC4     | 1,43609911  | 7,5342684  |

Table S3. List of primers. Related to Figures 1&5 and STAR Methods.

**qPCR primers**

| <b>Name</b> | <b>Sequence</b>          |
|-------------|--------------------------|
| ALDH3A1-F   | TGGAACGCCTACTATGAGGAG    |
| ALDH3A1-R   | GGGCTTGAGGACCACTGAG      |
| MGST1-F     | GCCACCTGAATGACCTTGA      |
| MGST1-R     | GTCTGAAGTGCAGGATGGCT     |
| GPX2-F      | GACTTCACCCAGCTCAACGA     |
| GPX2-R      | CCCCAGGACGGACATACTTG     |
| GAPDH-F     | GAAGGTGAAGGTCGGAGTC      |
| GAPDH-R     | GAAGATGGTGATGGGATTC      |
| cFlip-F     | GTTCAAGGAGCAGGGACAAG     |
| cFlip-R     | TCCCATTATGGAGCCTGAAG     |
| BCL2L1-F    | GTAAACTGGGGTCGCATTGT     |
| BCL2L1-R    | TGGATCCAAGGCTCTAGGTG     |
| ICAM1-F     | ATGCCAGACATCTGTGTCC      |
| ICAM1-R     | GGGGTCTCTATGCCCAACAA     |
| CCL5-F      | CCAGCAGTCGTCTTTGTCAC     |
| CCL5-R      | CTCTGGGTTGGCACACACTT     |
| CD95-F      | TCTGGTTCTTACGTCTGTTGC    |
| CD95-R      | CTGTGCAGTCCCTAGCTTTCC    |
| CD274-F     | TATGGTGGTGCCGACTACAA     |
| CD274-R     | TGGCTCCCAGAATTACCAAG     |
| IL-1A-F     | AGATGCCTGAGATACCCAAAACC  |
| IL-1A-R     | CCAAGCACACCCAGTAGTCT     |
| IL-1B-F     | AAGCCCTTGCTGTAGTGGTG     |
| IL-1B-R     | GAAGCTGATGGCCCTAAACA     |
| IL-6-F      | ACTCACCTCTTCAGAACGAATTG  |
| IL-6-R      | CCATCTTTGGAAGGTTTCAGGTTG |
| IL-8-F      | TCCTGATTTCTGCAGCTCTGT    |
| IL-8-R      | AAATTTGGGGTGGAAAGGTT     |
| BRD2-F      | GAGGTGTCCAATCCCAAAAAGC   |
| BRD2-R      | ATGCGAACTGATGTTTCCACA    |
| BRD3-F      | CTGAAACCCACCACTTTGCG     |
| BRD3-R      | GCTCCTCTTTGCGACTTGGCT    |
| BRD4-F      | ACCTCCAACCCTAACAAGCC     |
| BRD4-R      | TTCCATAGTGTCTTGAGCACC    |

**shRNA sequence:**

|                 |                                                                 |
|-----------------|-----------------------------------------------------------------|
| shBRD2#1        | CCGGGCCCTCTTTACGTGATTCAAACCTCGAGTTTGAATCACGTAAAGAGGGCTT<br>TTT  |
| shBRD2#1        | CCGGCCCTGCCTACAGGTTATGATTCTCGAGAATCATAACCTGTAGGCAGGGTT<br>TTT   |
| shBRD3#1        | CCGGCCCAAGAGGAAGTTGAATTATCTCGAGATAATTCAACTTCCTCTTGGG<br>TTTTT   |
| shBRD3#2        | CCGGGCTGATGTTCTCGAATTGCTACTCGAGTAGCAATTCGAGAACATCAGCTT<br>TTT   |
| shBRD4#1        | CCGGCCTGGAGATGACATAGTCTTACTCGAGTAAGACTATGTCATCTCCAGGTT<br>TTTG  |
| shBRD4#2        | CCGGCCCTTTGCTGTGACACTTCTTCTCGAGAAGAAGTGTCACAGCAAAGGGTT<br>TTT   |
| shGPX2#1        | CCGGCCTTGCAACCAATTTGGACATCTCGAGATGTCCAAATTGGTTGCAAGGTT<br>TTTG  |
| shGPX2#2        | CCGGCCGATCCCAAGCTCATCATTTCTCGAGAAATGATGAGCTTGGGATCGGTT<br>TTTG  |
| shALDH3A1#<br>1 | CCGGGCTAAGAAATCCCGGGACTATCTCGAGATAGTCCCGGGATTTCTTAGCTT<br>TTT   |
| shALDH3A1#<br>2 | CCGGCCTGCACAAGAATGAATGGAACCTCGAGTTCCATTATTCTTGTGCAGGTT<br>TTT   |
| shMGST1#1       | CCGGGCCAATATCCTGTATTCTTGTCTCGAGACAAGAATACAGGATATTGGCTT<br>TTTTG |
| shMGST1#2       | CCGGCATACTCAGCATCCAGTTCTCGAGAAGTGGATGCTGAGTTGTATGTT<br>TTTTG    |
